# Supplementary material for: Are the silyl group hydrogens in peri-substituted-9-silyltriptycenes engaged in blue-shifting hydrogen bonds?
Source: Royal Society of Chemistry journal article supplement (doi:10.1039/b815246b), 2009-01-01
Supplement: b815246b.pdf [file b815246b.pdf]

## Are the Silyl Group Hydrogens in *peri*-Substituted-9-Silyltriptycenes Engaged in Blue-Shifting Hydrogen Bonds?

T. Ratajczyk and S. Szymański\*

*Institute of Organic Chemistry, Polish Academy of Sciences, Kasprzaka 44/52, 01-224 Warsaw, Poland*

In this supplementary material,  $^1\text{H}$  NMR characteristics at room temperature of 1,4-dichloro-, 1,4-dibromo-, and 1,4-dimethyl-9-silyltriptycene, **1**, **2** and **3**, respectively, are given. Moreover,  $^1\text{H}$  COSY spectrum of **3** documenting the occurrence of *J*-couplings between the silyl and methyl group protons is shown.

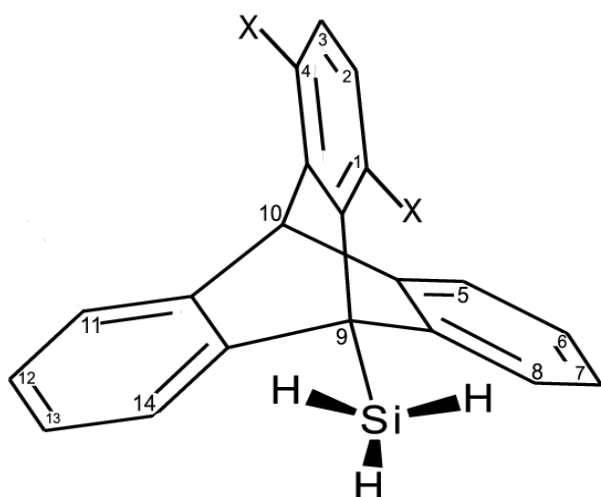

Fig. S1. Labelling of the skeleton positions in **1-3**.

### Experimental details

1,4-dichloro-, 1,4-dibromo-, and 1,4-dimethyl-9-silyltriptycene, **1**, **2**, and **3**, respectively, were synthesized by adapting the literature procedures.<sup>12</sup> The details of these rather cumbersome syntheses will be published elsewhere. The structures of the compounds

were confirmed by room-temperature  $^1\text{H}$  NMR spectra (500 MHz,  $\text{CDCl}_3$ ,  $\delta$ , see Fig. S1 for the position labelling); **1**: 4.45 (1H, br s,  $\text{SiHH}_2$ ), 4.98 (2H, br s,  $\text{SiHH}_2$ ), 5.970 (1H, s, C10-H), 6.900 (1H, d, C2-H or C3-H), 6.955 (1H, d, C3-H or C2-H), 7.07 - 7.11 (4H, m, C6-H, C7-H, C12-H, C13-H), 7.46 - 7.49 (2H, m, C5-H, C11-H), 7.60 - 7.63 (2H, m, C8-H, C14-H); **2**: 4.50 (1H, br s,  $\text{SiHH}_2$ ), 5.18 (2H, br s,  $\text{SiHH}_2$ ), 6.030 (1H, s, C10-H), 7.04 (1H, d,  $J = 8.60$  Hz, C2-H or C3-H), 7.07 (1H, d,  $J = 8.60$  Hz, C3-H or C2-H), 7.09 - 7.14 (4H, m, C6-H, C7-H, C12-H, C13-H), 7.49 - 7.52 (2H, m, C5-H, C11-H), 7.65 - 7.69 (2H, m, C8-H, C14-H); **3**: 2.49 (3H, s, C3- $\text{CH}_3$ ), 2.64 (3H, s, C2- $\text{CH}_3$ ), 4.75 (3H, br s,  $\text{SiH}_3$ ), 5.66 (1H, s, C10-H), 6.65 (1H, d,  $J = 7.80$  Hz, C2-H or C3-H), 6.72 (1H, d,  $J = 7.8$  Hz, C3-H or C2-H), 7.01 - 7.06 (4H, m, C6-H, C7-H, C12-H, C13-H), 7.38 - 7.43 (2H, m, C5-H, C11-H), 7.54 - 7.59 (2H, m, C8-H, C14-H).

For **3**, the assignments of both the methyl- and peri-protons' resonances were made on the basis of the difference NOE experiments at room temperature, with irradiation of the silyl protons' signal. The COSYLR spectrum of **3** was measured on a Bruker Avance II 300 MHz spectrometer at room temperature. Further details are given in Ref. 7.

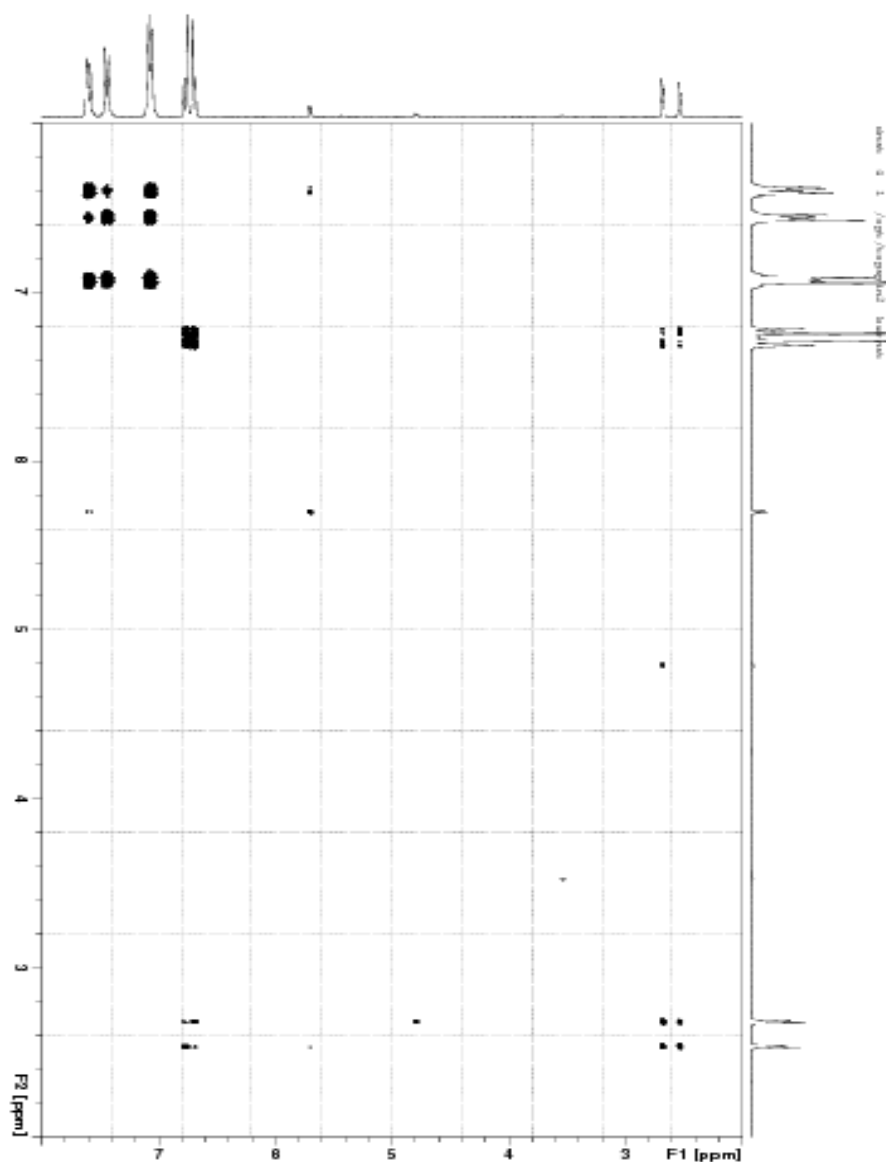

Fig. S2. <sup>1</sup>H (300 MHz) COSYLR spectrum of **3**, measured at room temperature. The SiH<sub>3</sub> resonance appears as the small, broad peak at 4.75 ppm. The coupling to the methyl protons is represented by the crosspeak at F1=2.65 ppm and F2 = 4.75 ppm.
